# Supplementary material
Source: PubMed Central journal article supplement (PMC2754879)
Supplement: NIHMS143135-supplement-1_si_001.pdf [file NIHMS143135-supplement-1_si_001.pdf]

## Supporting Information

### Methylation of 2'-Deoxyguanosine by a Free Radical Mechanism

Conor Crean, Nicholas E. Geacintov, and Vladimir Shafirovich

**Kinetics of DMSO oxidation by  $\text{SO}_4^{\bullet-}$  radicals.** Competition of one-electron oxidation of dG to form  $\text{dG}(-\text{H})^{\bullet}$  radicals (reaction 3, Table 1) and the one-electron oxidation of DMSO to form  $^{\bullet}\text{CH}_3$  radicals:

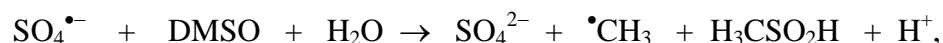

with the second-order rate constant,  $k_b$  can not accurately predict the yields of  $\text{dG}(-\text{H})^{\bullet}$  at high concentrations of DMSO. Indeed, the experimental yields of  $\text{dG}(-\text{H})^{\bullet}$  radicals at  $[\text{DMSO}] \geq 0.8$  mM are systematically higher than those predicted by the equation  $[\text{dG}(-\text{H})^{\bullet}]_{t=8\mu\text{s}}/[\text{SO}_4^{\bullet-}]_0 = k_3[\text{dG}]/(k_3[\text{dG}] + k_b[\text{DMSO}])$ , where the subscripts “0” and “ $t=8\mu\text{s}$ ” refer to the earliest time points after the actinic laser flash and completion of the formation of  $\text{dG}(-\text{H})^{\bullet}$  radicals, respectively (Figure S1)

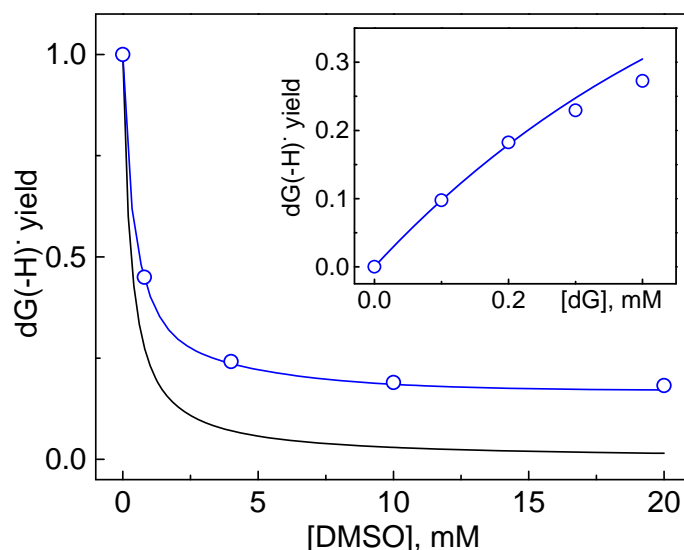

**Figure S1.** Reaction yields of  $\text{dG}(-\text{H})^{\bullet}$  radicals generated by  $\text{SO}_4^{\bullet-}$  radicals as a function of DMSO concentration at  $[\text{dG}] = 0.2$  mM and  $[\text{DMSO}] = 20$  mM (inset). Solid black line shows the  $\text{dG}(-\text{H})^{\bullet}$  yields calculated from the equation  $[\text{dG}(-\text{H})^{\bullet}]_{t=5\mu\text{s}}/[\text{SO}_4^{\bullet-}]_0 = k_3[\text{dG}]/(k_3[\text{dG}] + k_b[\text{DMSO}])$  at  $k_3 =$

$4.1 \times 10^9 \text{ M}^{-1} \text{ s}^{-1}$  (this work and ref.<sup>1</sup>) and  $k_b = 2.7 \times 10^9 \text{ M}^{-1} \text{ s}^{-1}$  (the previous pulse radiolysis experiments<sup>2</sup>). The yields of  $\text{dG}(-\text{H})^\bullet$  obtained by using the rate constants of reactions 3 – 6 in Table 1 are shown by blue lines.

To address this discrepancy we explored the kinetics of DMSO oxidation by  $\text{SO}_4^{\bullet-}$  radicals in a wide range of DMSO concentrations (0.1 – 20 mM). Under these conditions concentrations of the sulfate radicals,  $[\text{SO}_4^{\bullet-}] \ll [\text{DMSO}]$  and decay of  $\text{SO}_4^{\bullet-}$  radicals can be described by the first-order kinetics with the rate constant,  $k_a$ . Figure S2 shows that  $k_a$  calculated from the transient absorption profiles of the  $\text{SO}_4^{\bullet-}$  decay at 445 and 315 nm, increases linearly as a function of DMSO concentrations at  $[\text{DMSO}] < 1 \text{ mM}$ .

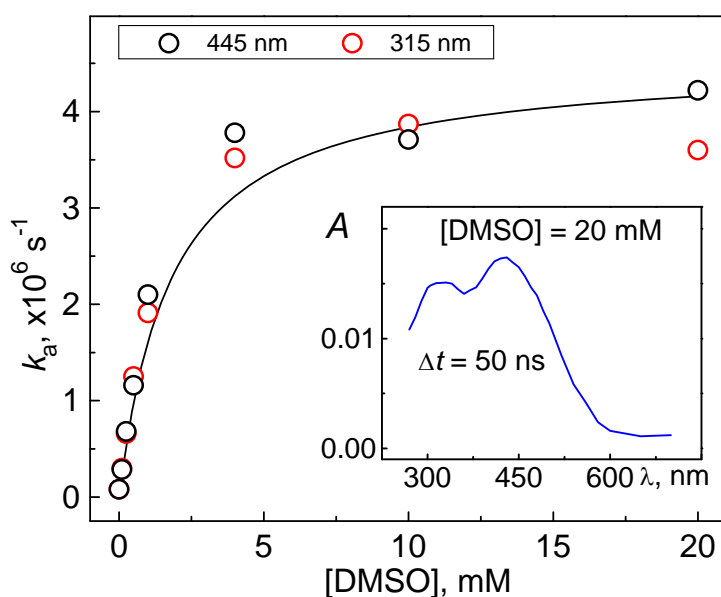

**Figure S2.** Rate constants,  $k_a$  for decay of  $\text{SO}_4^{\bullet-}$  radicals at 445 nm (black open circles) and 315 nm (red open circles) as a function of DMSO concentrations. Fitting the equation  $k_a = k_5 K_4 [\text{DMSO}] / (1 + K_4 [\text{DMSO}])$ , where  $K_4 = k_4 / k_{-4}$  is the equilibrium constant of the  $[\text{SO}_4^{\bullet-} \dots \text{DMSO}]$  complex formation, to the experimental data points is shown by a solid black line. Inset shows the transient absorption spectrum recorded at 50 ns after an actinic laser flash.

At [DMSO] > 1 mM the  $k_a$  dependence significantly deviates from a linear one and at [DMSO] > 5 mM the value of  $k_a$  attains a value, which only slightly depends on [DMSO]. This non-linear behavior of the  $k_a$  vs [DMSO] plot can be considered as indication for formation of the  $[\text{SO}_4^{\bullet-} \dots \text{DMSO}]$  complex. The spectrum of this complex recorded at 50 ns after an actinic laser flash at [DMSO] = 20 mM (inset in Figure S2) is very close to the spectrum of  $\text{SO}_4^{\bullet-}$  radicals shown in Figure 1. This spectrum significantly differs from the spectra of  $\text{DMSO}^{\bullet+}$  obtained at pH 4, where these radical cations are stable on a microsecond time scale and exhibit a broad absorption band at 300 nm with a greater extinction coefficient<sup>2</sup> of  $\sim 4 \times 10^3 \text{ M}^{-1} \text{ cm}^{-1}$  than  $\sim 1.2 \times 10^3 \text{ M}^{-1} \text{ cm}^{-1}$  in the case of  $\text{SO}_4^{\bullet-}$  radicals. The absence of the  $\text{DMSO}^{\bullet+}$  absorption band in the spectrum of the  $[\text{SO}_4^{\bullet-} \dots \text{DMSO}]$  complex recorded at pH 7.4 (inset in Figure S2) suggests that fragmentation of  $\text{DMSO}^{\bullet+}$  with formation of  $\bullet\text{CH}_3$  radicals occurs in not rate-determining step and decay of the  $[\text{SO}_4^{\bullet-} \dots \text{DMSO}]$  complex is controlled by electron transfer from DMSO to  $\text{SO}_4^{\bullet-}$ .

Fitting the equation  $k_a = k_5 K_4 [\text{DMSO}] / (1 + K_4 [\text{DMSO}])$  to the experimental data points (Figure S2) allows to determine the equilibrium constant of the  $[\text{SO}_4^{\bullet-} \dots \text{DMSO}]$  complex formation,  $K_4 = k_4 / k_{-4} = 480 \text{ M}^{-1}$  and the rate constant of the adduct decay,  $k_5 = 4.2 \times 10^6 \text{ s}^{-1}$  (Table 1) to form  $\bullet\text{CH}_3$  radicals. At  $K_4 [\text{DMSO}] < 1$  oxidation of DMSO by  $\text{SO}_4^{\bullet-}$  radicals follows second order kinetics with  $k_b = k_5 K_4 = 2 \times 10^9 \text{ M}^{-1} \text{ s}^{-1}$ , which is in a reasonable agreement with  $k_b = 2.7 \times 10^9 \text{ M}^{-1} \text{ s}^{-1}$  obtained in the previous pulse radiolysis experiments.<sup>2</sup> Since at high [DMSO] the equilibration between  $\text{SO}_4^{\bullet-}$  radicals, DMSO, and the complex is very fast, we suggested that the complex is controlled by diffusion of the reaction partners ( $k_4 = 1 \times 10^{10} \text{ M}^{-1} \text{ s}^{-1}$ ) that gives  $k_{-4} = 2.1 \times 10^7 \text{ s}^{-1}$  for the adduct dissociation (Table 1).

In the complex  $\text{SO}_4^{\bullet-}$  radical remains a strong oxidant that can oxidize dG to contribute in formation of  $\text{dG}(-\text{H})^\bullet$  (reaction 6). This reaction with the rate constant,  $k_6 = 3.8 \times 10^9 \text{ M}^{-1} \text{ s}^{-1}$  (Table 1) can explain the experimental yields of  $\text{dG}(-\text{H})^\bullet$  in all range of [DMSO] (Figure S2).

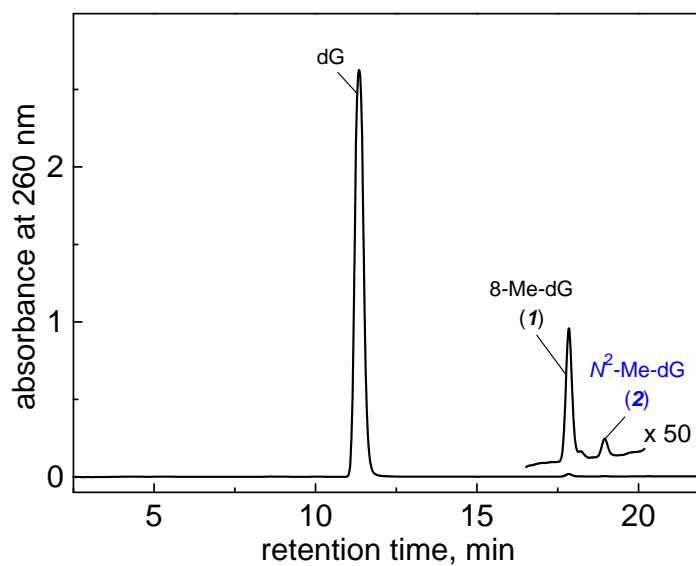

**Figure S3.** End-products generated by photolysis of 0.1 mM methylcob(III)alamin (0.1  $\mu$ mole) in the presence of 1 mM dG (1  $\mu$ mole) in deoxygenated 10mM phosphate buffer sample solutions (1 ml) using 340 – 390 nm steady-state irradiation ( $\sim 100$  mW/cm<sup>2</sup>) from a 100 W Xe arc lamp for 10 min. Reversed-phase HPLC elution conditions (detection of products at 260 nm): 1 – 40% gradient of methanol in 20 mM sodium phosphate buffer (pH 7) over 60 min.

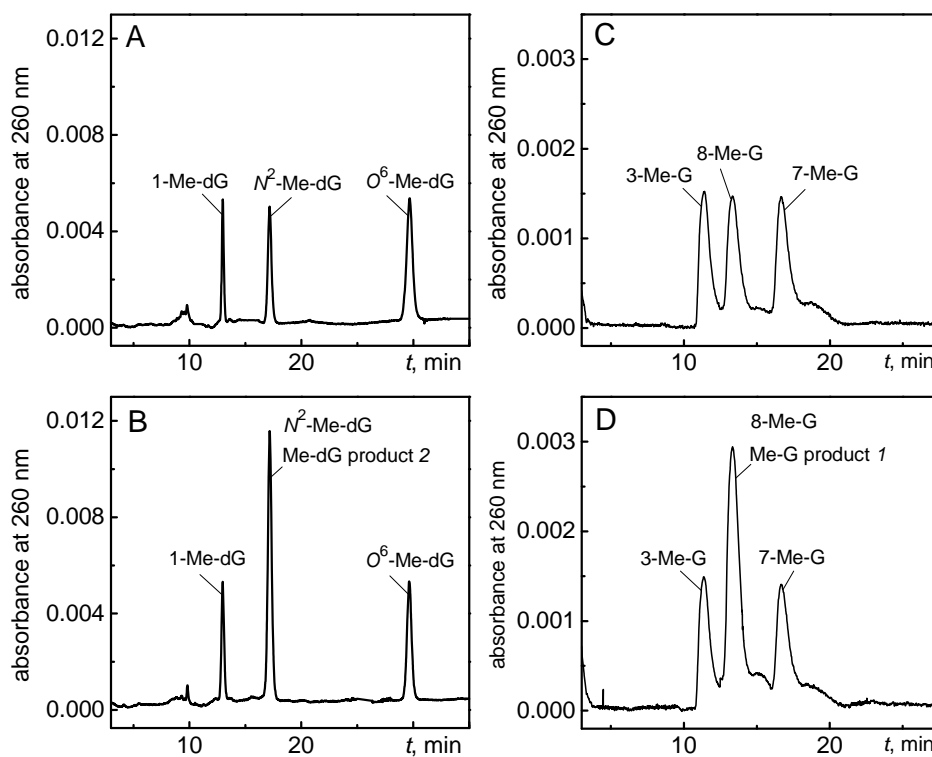

**Figure S4.** Reversed-phase HPLC analysis of the Me-dG product **2** (A, B) and Me-G product **1** (C, D).

HPLC elution conditions (detection of products at 260 nm): Panels A and B: 0 – 30% gradient of methanol in 20 mM ammonium acetate over 60 min; the Me-dG product **2** co-elutes with  $N^2$ -Me-dG at 17.1 min. Panels C and D: isocratic elution with 99%  $H_2O$  : 1% methanol ; the Me-G product **1** co-elutes with 8-Me-G at 13.3 min.

**Positive product ion spectra of methyl-2'-deoxyguanosines.** In order to obtain more direct structural information on the positions of the methyl groups, LC-MS/MS methods were employed to investigate the distributions of daughter ions generated by the extensive fragmentation of the aglycone ions,  $[\text{BH}_2]^+$ , derived from the detachment of the sugar residues from the molecular ions. The positive product ion spectra of the unlabeled (natural  $^{14}\text{N}$ -isotopes) and uniformly  $^{15}\text{N}$ -labeled samples of 8-Me-dG and  $N^2$ -Me-dG derived from the combination of the  $\text{dG}(-\text{H})^\bullet$  and  $^\bullet\text{CH}_3$  radicals (Figure S5).

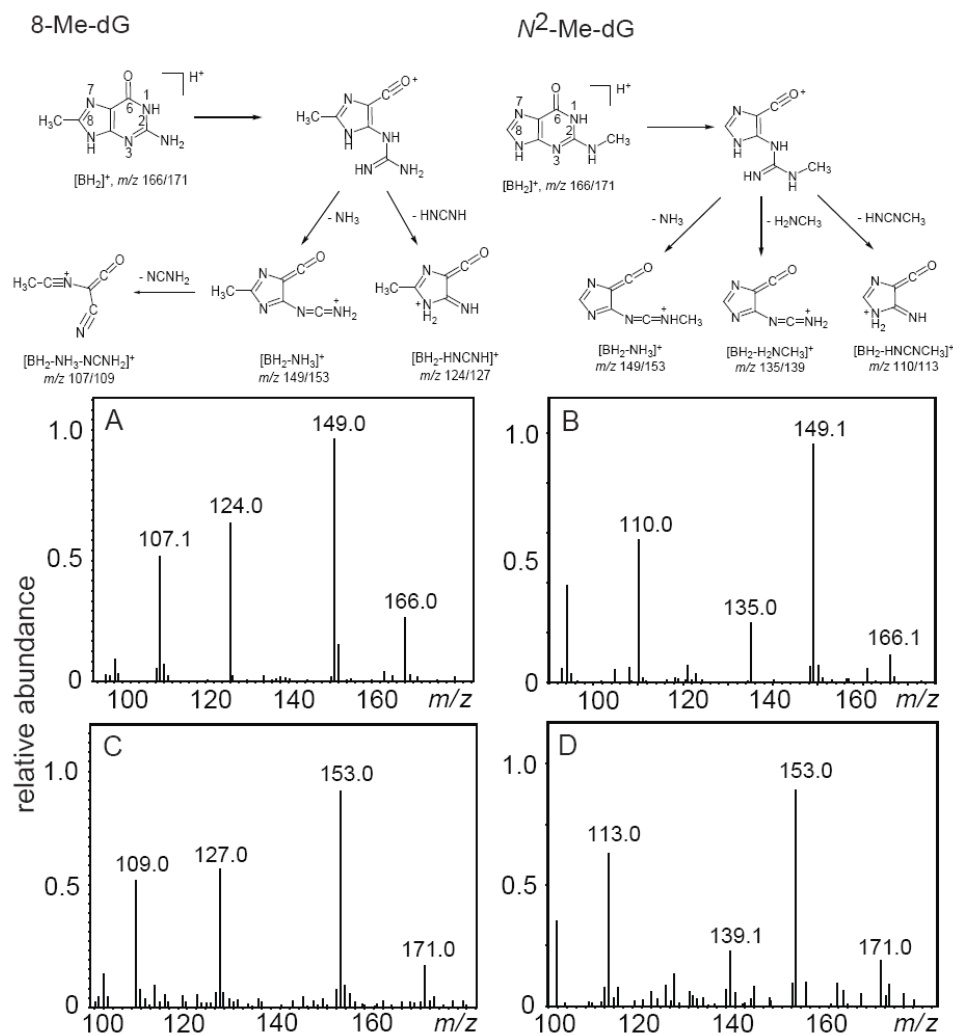

**Figure S5.** Positive product ion spectra of the unlabeled (natural  $^{14}\text{N}$ -isotopes, Panels A and B) and uniformly labeled ( $^{15}\text{N}$ -isotopes, Panels C and D) 8-methyl-dG (Panels A and C) and  $N^2$ -methyl-dG (Panels B and C) isolated from the irradiated solutions as shown in Figure 5. Fragmentation pathways of the aglycone ions,  $[\text{BH}_2]^+$  triggered by the opening of the pyrimidine ring<sup>3</sup> are shown at the top of this Figure.

In these spectra, the differences in the masses of the ions of  $^{14}\text{N}$ -Me-dG and  $^{15}\text{N}$ -Me-dG products yield the number of nitrogen atoms in these ions.

We found that the fragmentation of the  $[\text{BH}_2]^+$  ions can be rationalized in terms of the mechanism proposed by Gregson and McCloskey for guanine.<sup>3</sup> According to this mechanism, the fragmentation of the  $[\text{BH}_2]^+$  ions is triggered by the initial opening of the pyrimidine ring followed by two principal pathways validated by  $^{15}\text{N}$ -labeling: (i) expulsion of ammonia ( $\text{NH}_3$ ) or methylamine ( $\text{H}_2\text{NCH}_3$ ), and (ii) expulsion of the  $\text{CH}_2\text{N}_2$  fragment via two tautomeric forms (cyanamide,  $\text{NCNH}_2$ , or carbodiimide,  $\text{HNCNH}$ ), or the  $\text{C}_2\text{H}_4\text{N}_2$  fragment in the form of the *N*-methylcarbodiimide ( $\text{HNCNCH}_3$ ). The first pathway results in the formation of the  $[\text{BH}_2\text{-NH}_3]^+$  ion at  $m/z$  149 detected in the spectra of all methylguanine products (Figures S5A, S5B and S6 – S11), and the  $[\text{BH}_2\text{-H}_2\text{NCH}_3]^+$  ion at  $m/z$  135 observed in the case of  $N^2$ -Me-G (Figures S5B and S7), but not in the case of 8-Me-G (Figures S5A and S11). In the case of 8-Me-G the second pathway associated with the excision of the  $\text{CH}_2\text{N}_2$  fragment results in the formation of the  $[\text{BH}_2\text{-HNCNH}]^+$  ion at  $m/z$  124 and the  $[\text{BH}_2\text{-NH}_3\text{-NCNH}_2]^+$  ion at  $m/z$  107, respectively (Figures S5A and S11). These ions are not observed in the  $N^2$ -Me-G spectrum, because in this compound, the exocyclic  $\text{NH}_2$  group is methylated and the second pathway results in the expulsion of *N*-methylcarbodiimide ( $\text{HNCNCH}_3$ ) to form the  $[\text{BH}_2\text{-HNCNCH}_3]^+$  ion at  $m/z$  110 (Figures S5B and S7). Thus, analysis of the fragment ion distributions allows a straightforward differentiation of 8-Me-G and  $N^2$ -Me-G in which different rings are methylated (purine in 8-Me-G and pyrimidine in  $N^2$ -Me-G). However, the differentiation of  $N^2$ -Me-G and 1-Me-G is not feasible because, after the initial pyrimidine ring opening (Figures S5B, S6 and S7), the N1 and  $N^2$  atoms become undistinguishable.<sup>3</sup>

Differentiation between 8-Me-G (Figures S5A and S11) and 7-Me-G (Figure S10) is also not possible, because the positive ion spectra of these isomers are practically the same. Although 3-Me-G does not show any ion products with  $m/z$  124, it exhibits an ion at  $m/z$  107 (Figure S8) that does not allow for a direct identification of this product in the presence of 7-Me-G and 8-Me-G. In turn,  $O^6$ -Me-dG (Figure S9) can be differentiated from 1-Me-G and  $N^2$ -Me-G (Figures S6 and S7) by the appearance of the marker ion at  $m/z$  134. The series of daughter ions detected at  $m/z$  166, 149, 134 and 110 in the case of

$O^6$ -CH<sub>3</sub>-dG is altered to ions detected at  $m/z$  169, 152, 134 and 110 in the case of  $O^6$ -CD<sub>3</sub>-dG with deuterium atoms in the methyl group.<sup>4</sup> According to these results, the ion at  $m/z$  134 is formed via expulsion of the CH<sub>3</sub>/CD<sub>3</sub> group from the [BH<sub>2</sub>-NH<sub>3</sub>]<sup>+</sup> ion at  $m/z$  149 that allows for a differentiation of  $O^6$ -CH<sub>3</sub>-dG from other methyl guanines (Figures S6 – S11). Thus, analysis of the fragmentation patterns provides a direct differentiation of  $O^6$ -Me-dG and of other methylguanines into two groups: (i) 7-Me-G, 8-Me-G, and 3-Me-G, and (ii) 1-Me-G and  $N^2$ -Me-G.

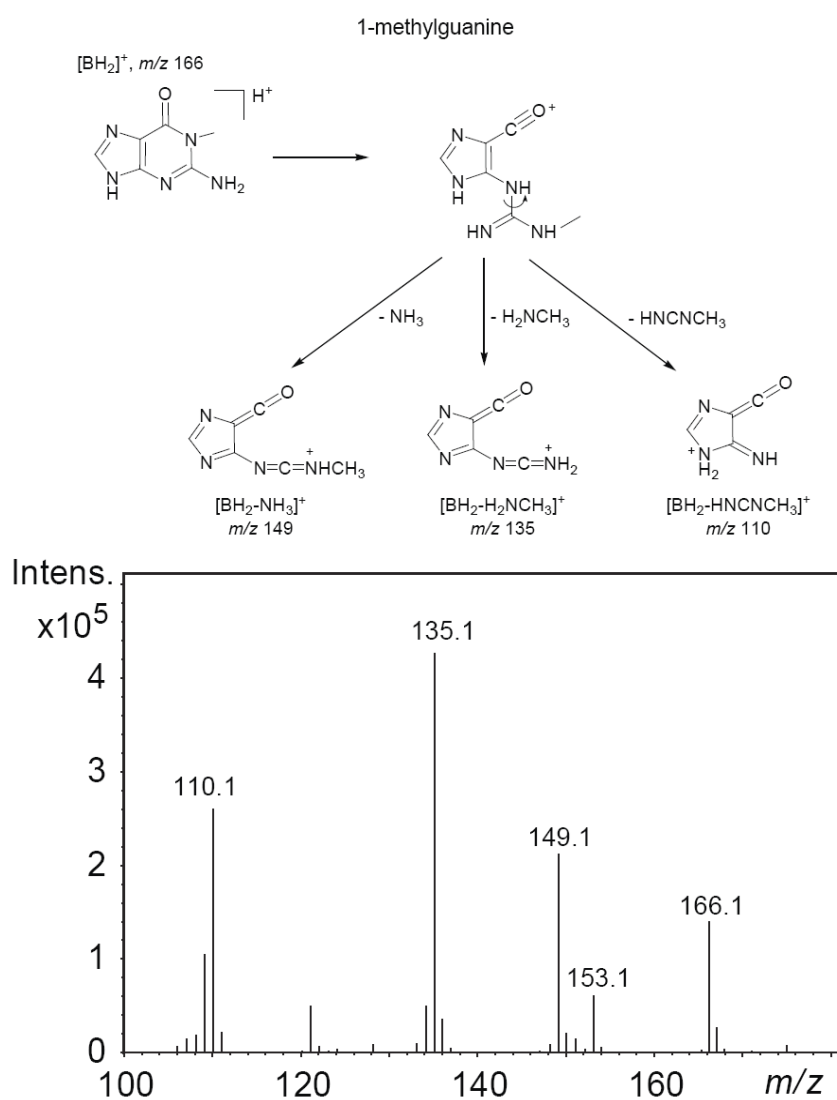

**Figure S6.** Positive product ion spectra of 1-methylguanine.

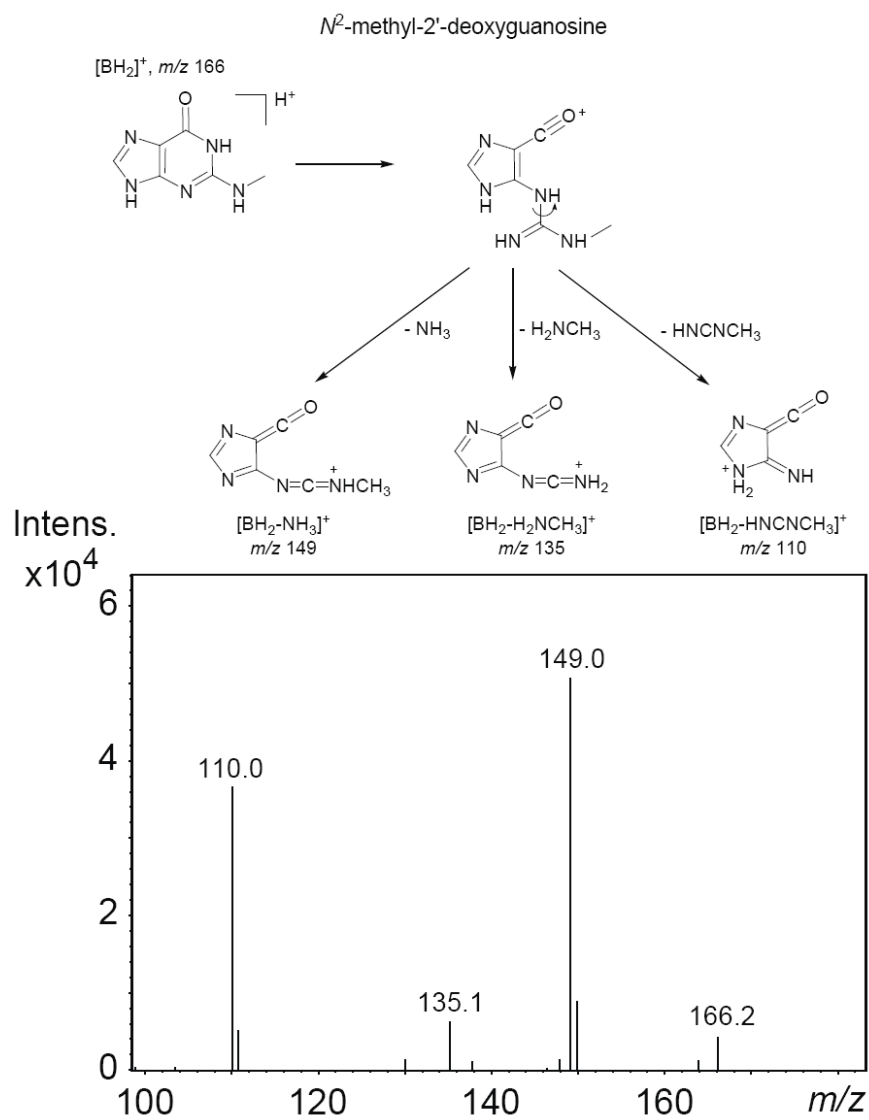

**Figure S7.** Positive product ion spectra of *N*<sup>2</sup>-methyl-dG.

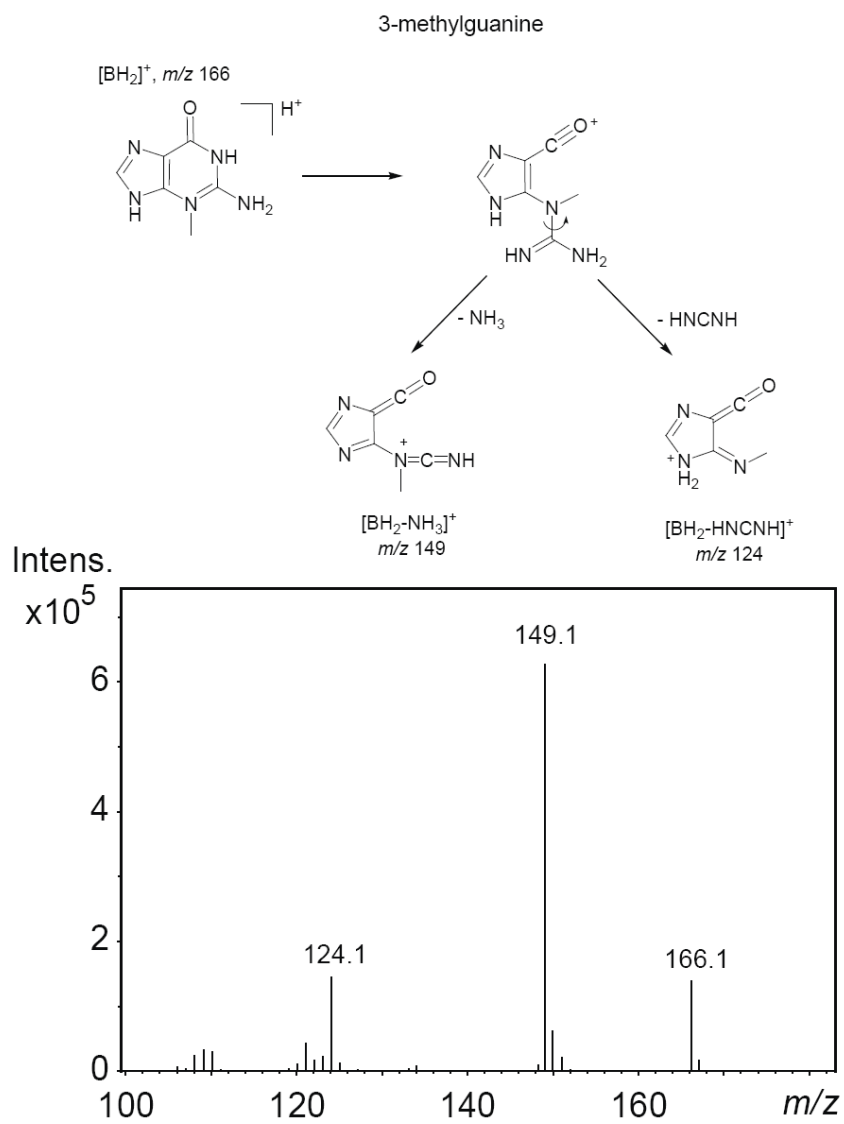

**Figure S8.** Positive product ion spectra of 3-methylguanine.

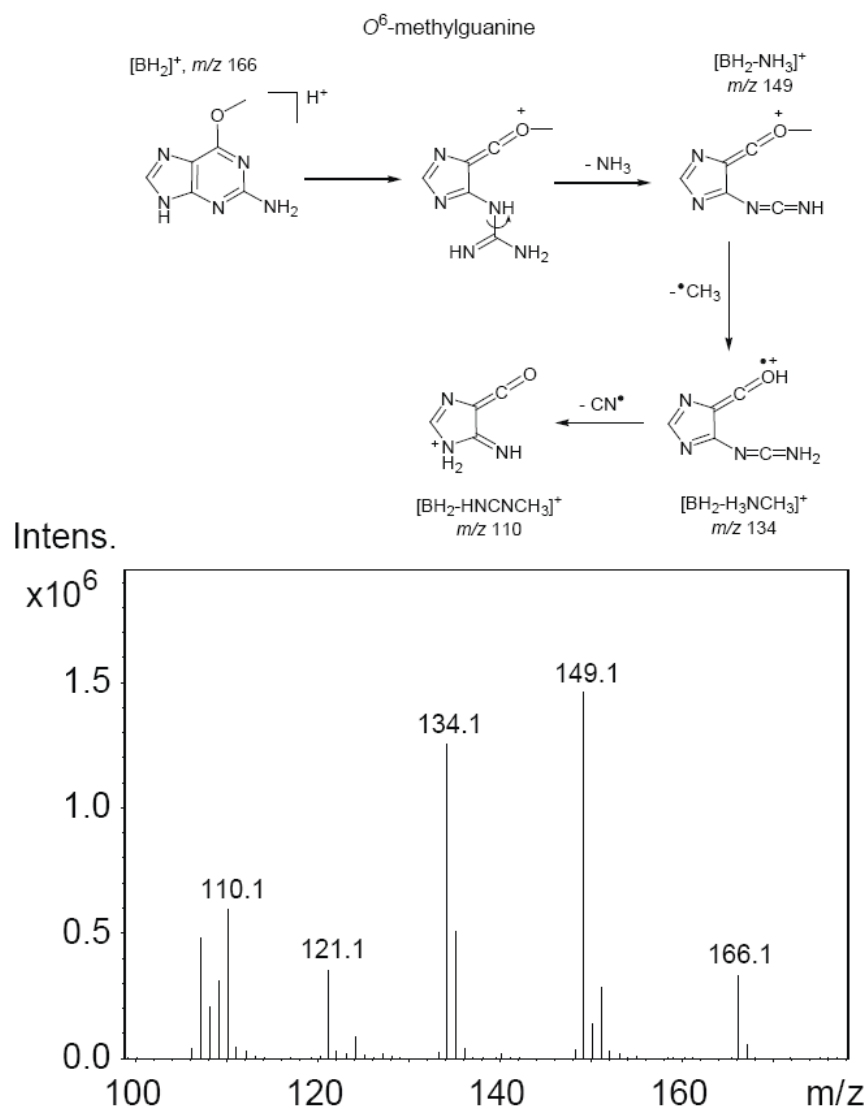

**Figure S9.** Positive product ion spectra of *O*<sup>6</sup>-methyl-dG.

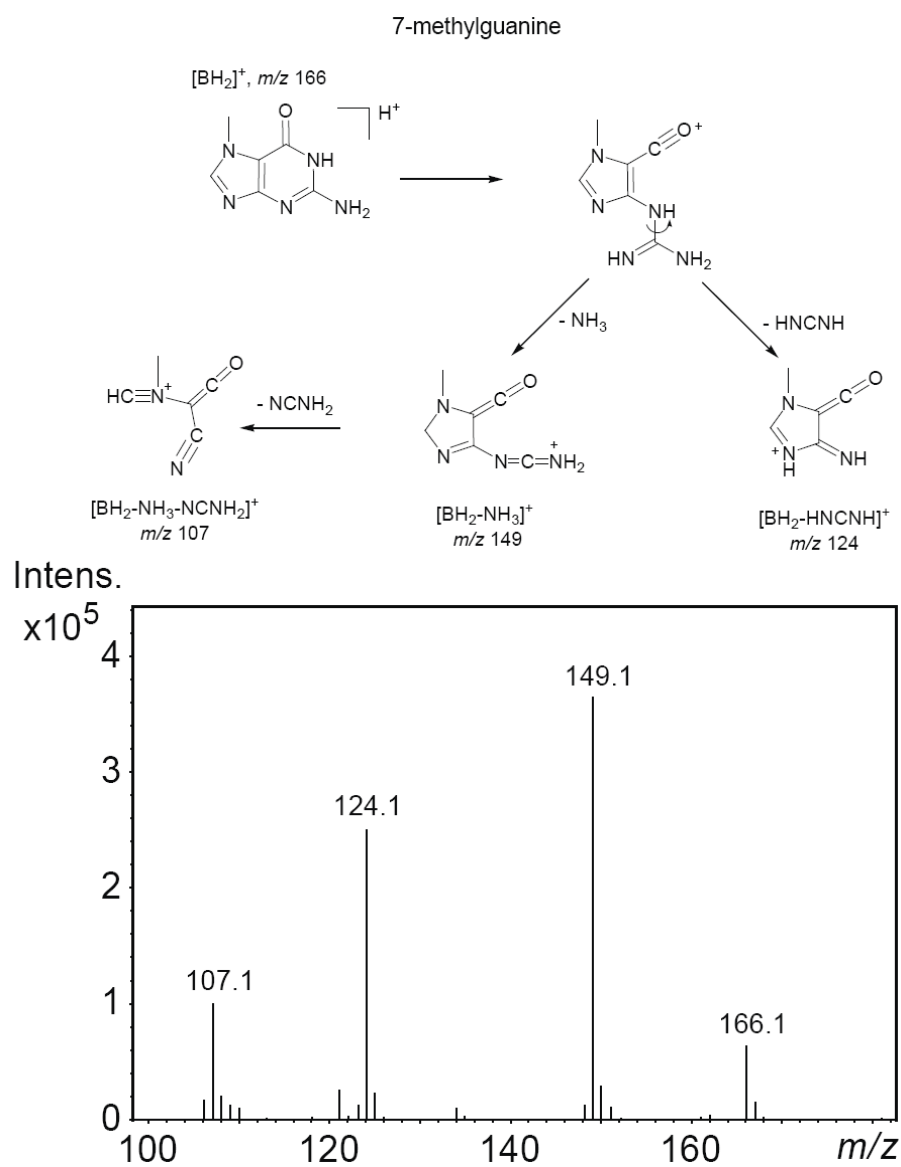

**Figure S10.** Positive product ion spectra of 7-methylguanine.

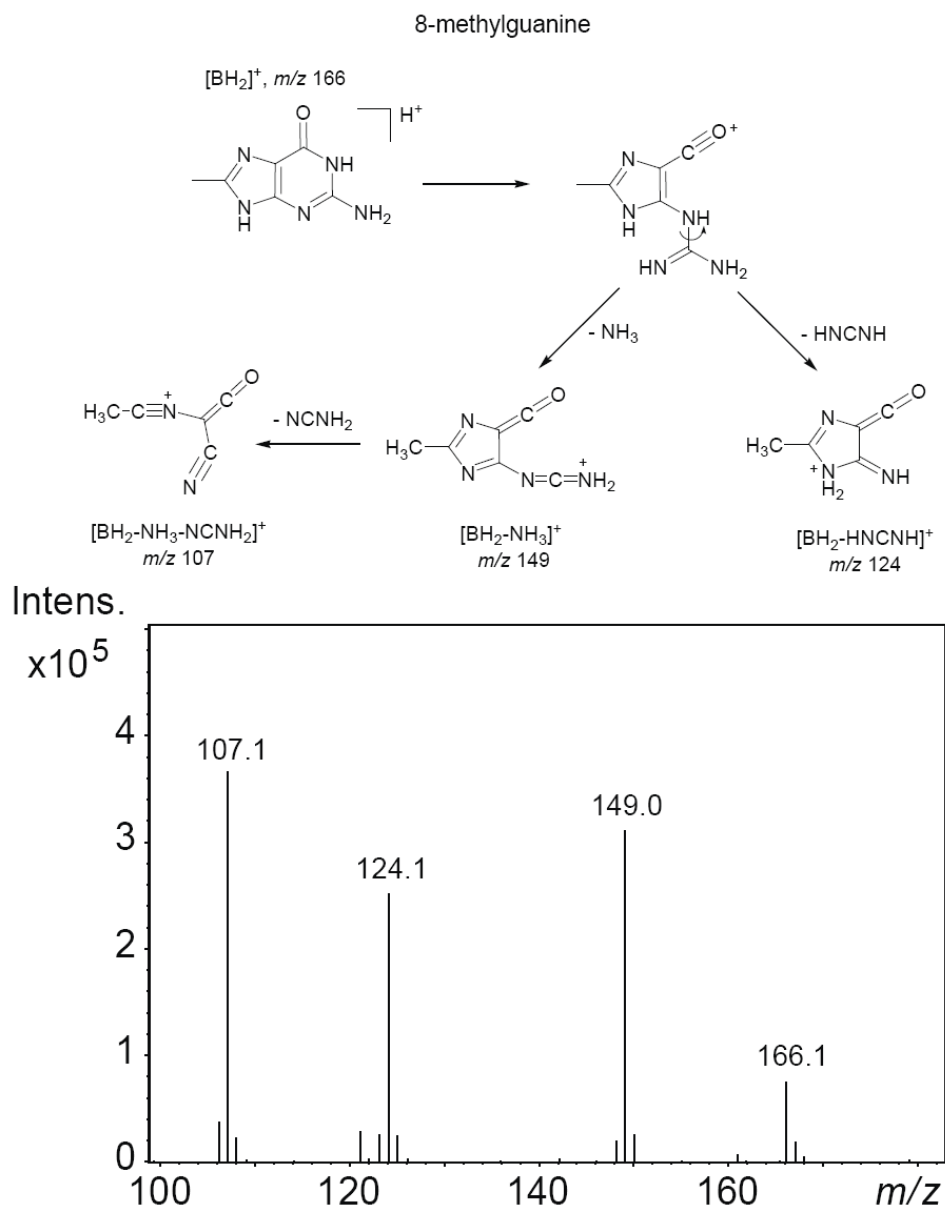

**Figure S11.** Positive product ion spectra of 8-methylguanine.

## References

- (1) Candeias, L. P.; Steenken, S. *J. Am. Chem. Soc.* **1989**, *111*, 1094-1099.
- (2) Kishore, K.; Asmus, K.-D. *J. Chem. Soc. Perkin Trans. 2* **1989**, 2079-2084.
- (3) Gregson, J. M.; McCloskey, J. A. *Int. J. Mass Spectrom.* **1997**, *165/166*, 475-485.
- (4) Zhang, F.; Bartels, M. J.; Pottenger, L. H.; Gollapudi, B. B.; Schisler, M. R. *J. Chromatogr. B* **2006**, *833*, 141-148.
